1 Research article

2

3 **Biological capacities clearly define a major subdivision in Domain Bacteria**

4

5 Raphaël Méheust<sup>+,1,2</sup>, David Burstein<sup>+,1,3,8</sup>, Cindy J. Castelle<sup>1,2,4</sup> and Jillian F. Banfield<sup>1,2,4,5,6,7,\*,#</sup>

6

7 <sup>1</sup>Department of Earth and Planetary Science, University of California, Berkeley, Berkeley, CA, USA

8 <sup>2</sup>Innovative Genomics Institute, Berkeley, CA, USA

9 <sup>3</sup> California Institute for Quantitative Biosciences (QB3), University of California Berkeley, CA USA

10 <sup>4</sup>Chan Zuckerberg Biohub, San Francisco, CA, USA

11 <sup>5</sup>University of Melbourne, Melbourne, VIC, Australia

12 <sup>6</sup>Lawrence Berkeley National Laboratory, Berkeley, CA, USA

13 <sup>7</sup>Department of Environmental Science, Policy and Management, University of California, Berkeley,  
14 Berkeley, CA, USA

15 <sup>8</sup>Present address: School of Molecular and Cell Biology and Biotechnology, George S. Wise Faculty of  
16 Life Sciences, Tel Aviv University, Tel Aviv, Israel

17 <sup>+</sup>These authors contributed equally to this work

18 <sup>\*</sup>Correspondence: [jbanfield@berkeley.edu](mailto:jbanfield@berkeley.edu)

19 <sup>#</sup>Lead Contact

20

21 **Resume**

22 Phylogenetic analyses separate candidate phyla radiation (CPR) bacteria from other bacteria, but  
23 the degree to which their proteomes are distinct remains unclear. Here, we leveraged a proteome  
24 database that includes sequences from thousands of uncultivated organisms to identify protein  
25 families and examine their organismal distributions. We focused on widely distributed protein  
26 families that co-occur in genomes, as they likely foundational for metabolism. Clustering of  
27 genomes using the protein family presence/absence patterns broadly recapitulates the phylogenetic  
28 structure of the tree, suggesting persistence of core sets of protein families after lineage divergence.  
29 CPR bacteria group together and away from all other bacteria and archaea, in part due to novel  
30 proteins, some of which may be involved in cell-cell interactions. The diversity of combinations  
31 of protein families in CPR may exceed that of all other bacteria. Overall, the results extend the  
32 phylogeny-based suggestion that the CPR represent a major subdivision within Bacteria.

## 33 Introduction

34

35 Metagenomic investigations of microbial communities have generated genomes for a huge  
36 diversity of bacteria and archaea, many from little studied or previously unknown phyla (Castelle  
37 and Banfield, 2018). For example, a study of an aquifer near the town of Rifle, Colorado generated  
38 49 draft genomes for several groups of bacteria, some of which were previously known only based  
39 on 16S rRNA gene surveys and others that were previously unknown (Wrighton et al., 2012). Draft  
40 genomes for bacteria from related lineages were obtained in a single cell sequencing study that  
41 targeted samples from a broader variety of environment types (Rinke et al., 2013). Based on the  
42 consistently small predicted genome sizes for bacteria from these groups, groundwater filtration  
43 experiments targeting ultra-small organisms were conducted to provide cells for imaging (Luef et  
44 al., 2015) and DNA for increased genomic sampling. The approach yielded almost 800 genomes  
45 from a remarkable variety of lineages that place together phylogenetically. This monophyletic  
46 group were described as the Candidate Phyla Radiation (CPR) (Brown et al., 2015). CPR bacterial  
47 genomes have since been recovered from the human microbiome (He et al., 2015), drinking water  
48 (Danczak et al., 2017), marine sediment (Orsi et al., 2017), deep subsurface sediments  
49 (Anantharaman et al., 2016), soil (Starr et al., 2017), the dolphin mouth (Dudek et al., 2017) and  
50 other environments. Thus, it appears that CPR bacteria are both hugely diverse and widespread  
51 across earth's environments.

52 Metabolic analyses of CPR genomes consistently highlight major deficits in biosynthetic  
53 potential, leading to the prediction that most of these bacteria live as symbionts. Cultivation from  
54 human oral samples highlighted the attachment of a CPR member of the lineage Saccharibacteria  
55 (TM7) to the surface of an *Actinomyces odontolyticus* bacteria (He et al., 2015). Another  
56 episympiotic association has been described between a CPR organism from the Parcubacteria  
57 superphylum and an eukaryotic host (Gong et al., 2014). However, most CPR organisms are likely  
58 symbionts of bacteria or archaea, given their abundance and diversity in samples that have few, if  
59 any, eukaryotes (Castelle and Banfield, 2018).

60 When first described, the CPR was suggested to comprise at least 15% of all Bacteria  
61 (Brown et al., 2015). Subsequently, Hug et al. placed a larger group of CPR genome sequences in  
62 context via construction of a three domain tree and noted that the CPR could comprise as much as  
63 50% of all bacterial diversity (Hug et al., 2016). The CPR placed as the basal group in the bacterial

64 domain in a concatenated ribosomal protein tree, but the deep branch positions were not  
65 sufficiently well supported to enable a conclusion regarding the point of divergence of CPR from  
66 other bacteria. The scale of the CPR is also controversial. For example, Parks et al. suggested that  
67 the group comprises no more than 26.3% of bacterial phylum-level lineages (Parks et al., 2017).  
68 Their analyses were based on a FastTree (Price et al., 2009) constructed using an alignment of 120  
69 concatenated proteins, some of which do not occur in CPR. Removal of genomes with < 40% of  
70 the alignment length resulted in exclusion of most of the CPR sequences. Regardless, the CPR  
71 clearly represents a huge segment of bacterial diversity.

72 To date, most studies have predicted CPR metabolic traits using one or a few genomes.  
73 Lacking are studies that look radiation-wide at the distribution of capacities that are widespread  
74 thus likely contribute core functions, including those encoded by hypothetical proteins. Moreover,  
75 examination of genetic potential across the CPR and general comparisons of CPR and non-CPR  
76 bacteria have been very limited. Here, we leveraged a large set of publicly available, high quality  
77 genomes of CPR and non-CPR bacteria to address these questions. We clustered protein sequences  
78 from 3,598 genomes into families and evaluated the distribution of these protein families over  
79 genomes. By focusing only on protein families that are common in CPR bacteria and/or non-CPR  
80 bacteria, we demonstrate a major subdivision within the bacterial domain without reliance on gene  
81 or protein sequence phylogenies.

82

## 83 Results

### 84 Clustering of proteins into families and assessment of cluster quality

85 We collected 3,598 genomes from four published datasets (Anantharaman et al., 2016;  
86 Brown et al., 2015; Castelle et al., 2015; Probst et al., 2017). The dataset includes 2,321 CPR  
87 genomes from 65 distinct phyla (1,953,651 proteins), 1,198 non-CPR bacterial genomes from 50  
88 distinct phyla (3,018,597 proteins) and 79 archaeal genomes (89,709 proteins) (Figure 1). Note  
89 that this huge sampling of Candidate Phyla was only possible due to genomes reconstructed in the  
90 last few years (Figure 1). We clustered the 5,061,957 protein sequences in a multi-step procedure  
91 (see materials and methods) to generate groups of homologous proteins. The objective was to  
92 convert amino acid sequences into units of a common language, allowing us to compare the  
93 proteomes across a huge diversity of genomes. This resulted in 21,859 clusters that were present  
94 in at least 5 distinct genomes. These clusters are henceforth referred to as protein families.

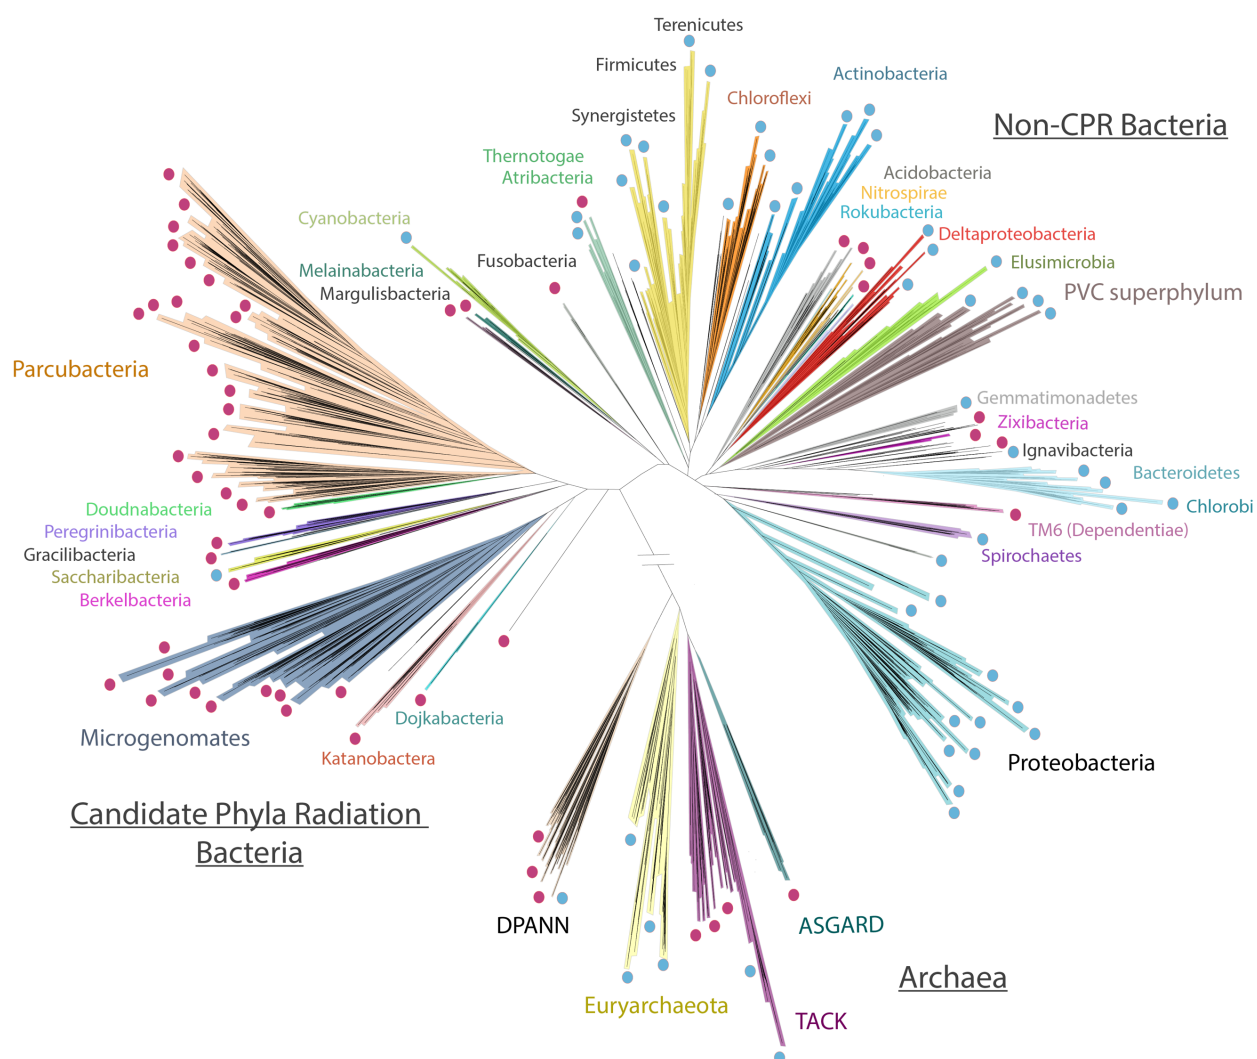

95

96 **Figure 1. Schematic tree illustrating the phylogenetic sampling used in this study (the**  
97 **diagram is based on a tree published recently in (Castelle and Banfield, 2018)). Lineages**  
98 **that were included in the datasets are highlighted with a dot. Lineages lacking an isolated**  
99 **representative are highlighted with red dots. The number of genomes per lineages is**  
100 **available in Figure S1.**

101

102 To assess the extent to which the protein clusters group together proteins with shared  
103 functions, we analyzed some families with well-known functions, such as the 16 ribosomal  
104 proteins that are commonly used in phylogeny. Because these proteins are highly conserved, we  
105 expect one protein family per ribosomal subunit. For instance, we expected to have all proteins  
106 annotated as the large subunit 3 (RPL3) be clustered into the same family. For 10 out of 16 subunits,  
107 all proteins clustered into one single family (Table S1). The six remaining ribosomal subunits  
108 clustered into several families. However, one family always contained >95% of the proteins (Table  
109 S1). Interestingly, for five of the six subunits represented by more than one family, the  
110 fragmentation was a result of differences in protein length due to amino-acid extensions in the C-  
111 terminal or N-terminal regions. For instance, each of the 10 proteins from family 3.6k.fam10722  
112 (consisting of RPL22 proteins, See Table S1) carries an extra 50 amino acids in the C-terminal  
113 region that is lacking in proteins of family 3.6k.fam00371 (Figure S1A). However, proteins from  
114 both families carry the domain of the large ribosomal subunit 22 (Figure S1A). We annotated our  
115 protein dataset using the KEGG annotations and systematically verified that the protein family  
116 groupings approximate functional annotations. For each KEGG accession, we reported the family  
117 which contains the highest ratio of proteins annotated with that KEGG accession. The distribution  
118 of the highest ratios shows that the majority of KEGG accessions is present in one major family  
119 (Figure S1B). We also checked the level of annotation admixture within the families. For each  
120 family, we computed the ratio of the KEGG accessions that are different than the most abundant  
121 accession (Figure S1C). The distribution of the ratios near 0 indicates that the vast majority of the  
122 families has no annotation admixture.

123

124

125

126

127 The distribution of widespread proteins subdivides CPR from all other Bacteria.

128

129 For definition of protein families, we chose a dataset that includes sequences from a huge  
130 diversity of uncultivated lineages and (unlike most reference genome datasets), genomes from the  
131 majority of all bacterial phyla (Figure 1). We constructed an array of the 3,598 genomes (rows)  
132 vs. all protein families (columns) and hierarchically clustered the genomes based on profiles of  
133 protein family presence/absence. The families were also hierarchically clustered based on profiles  
134 of genome presence/absence (Figure 2A). Notably, the distinct pattern of protein family  
135 presence/absence in CPR genomes separates them from almost all non-CPR bacteria and from  
136 archaea (Figure 2A).

137 Certain protein families cluster together due to co-existence in multiple genomes (blocks  
138 of black and orange dots in Figure 2A). Strikingly, some blocks with numerous families are  
139 widespread in non-CPR bacteria while mostly absent in CPR (Figure 2A), they may explain the  
140 observed separation of the CPR from the non-CPR Bacteria. We decided to focus on the large  
141 blocks of families that are widespread among the 115 bacterial phyla analyzed. We identified co-  
142 occurring blocks of protein families (sharing similar patterns of presence/absence across the  
143 genomes) using the Louvain algorithm (Blondel et al., 2008). We defined modules as blocks of  
144 co-occurring protein families containing at least 10 families. 7,962 protein families could be  
145 assigned to 156 modules. The remaining 13,997 protein families were not considered further. 150  
146 of the 156 modules are sparsely distributed among the 115 bacterial phyla (blue dots in Figure  
147 2B); these were also excluded from further analysis so that the study could focus only on the six  
148 modules that occur in most CPR bacterial genomes, in most non-CPR bacterial genomes or in both  
149 (orange dots in Figure 2B). Some modules also occur in archaeal genomes, so archaeal genomes  
150 were retained in the study.

151 One module, containing many core information system proteins, is essentially ubiquitous  
152 across the dataset (orange dot #1 in Figure 2B). Two modules are present in at least 10 non-CPR  
153 bacterial phyla (orange dots #2, 3 in Figure 2B). Strikingly, these modules are mostly absent in  
154 CPR bacteria. Three modules occur in more than 10 CPR bacterial phyla (orange dots #4, 5, 6 in  
155 Figure 2B).

156 The six numbered modules comprise 786 protein families that we consider to be  
157 widespread across the bacterial domain (blocks of orange dots in Figure 1.A). Unsurprisingly,

158 given their widespread distribution, most these 786 families are involved in well-known functions,  
159 including replication, transcription and translation to basic metabolism (energy, nucleotides,  
160 amino-acids, cofactors and vitamins) and environmental interactions (membrane transport such as  
161 the Sec pathway) (Table S2). We consider it likely that these widespread sets of co-occurring  
162 proteins are foundations upon which lineage-specific metabolisms are based.  
163

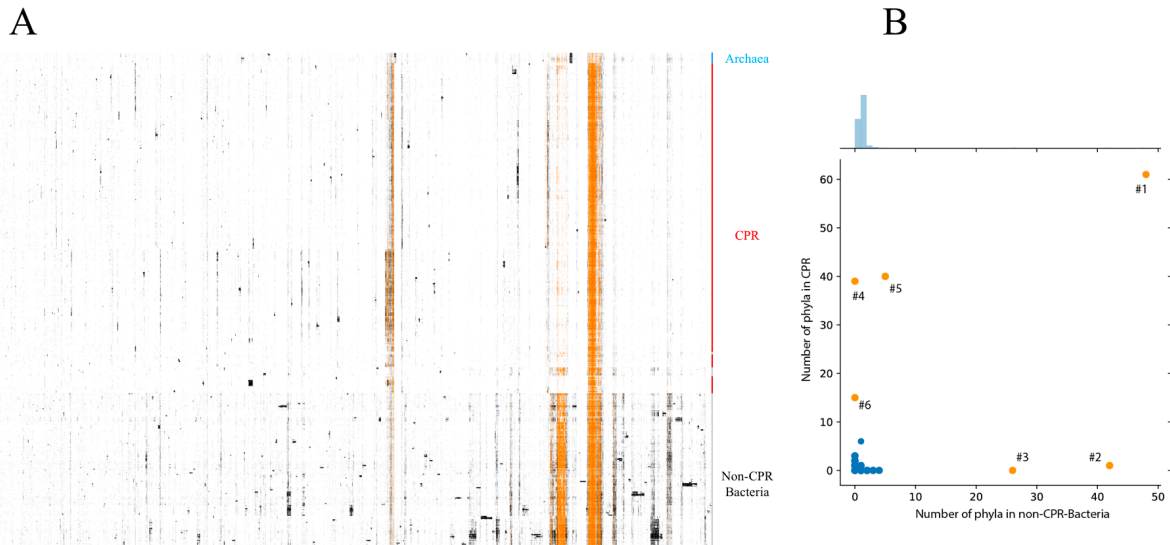

164  
165 **Figure 2. A. The distribution of the 21,859 families (columns) across the 3,598 prokaryotic**  
166 **genomes (rows). Data are clustered based on the presence (black) / absence (white) profiles**  
167 **(Jaccard distance, hierarchical clustering using a complete linkage) (Archaea: blue, CPR:**  
168 **red, non-CPR-Bacteria: gray). The patterns in orange correspond to the presence/absence**  
169 **patterns of the 786 widespread families that were retained for further analysis. B. The phyla**  
170 **distribution of the 156 modules of proteins in CPR (y-axis) and non-CPR-Bacteria (x-axis).**  
171 **Each dot corresponds to a module. The orange dots correspond to the 6 widespread modules**  
172 **that have been kept for further analysis.**

173  
174 We conducted an unsupervised clustering of the genomes based on the presence/absence  
175 profiles of the 786 families considered to be widely distributed across the genomic dataset. As  
176 seen in Figure 2, the results clearly distinguish the CPR bacteria from other bacteria and archaea  
177 (Figure 3A). The interesting exception is the Dependientiae phylum (TM6), which is nested in the  
178 CPR group between Microgenomates and Parcubacteria (Figure 3B) although phylogenetic trees  
179 based on core genes clearly place Dependientiae outside of the CPR (Brown et al., 2015).

180 Remarkably, within the CPR, genomes are clustered together based on the protein family  
 181 distribution in patterns that are generally consistent with their phylogeny (Figures 3B and 3C). The  
 182 Microgenomates and Parcubacteria superphyla form two distinct groups (Figure 3B), with  
 183 Dojkabacteria (WS6) and Katanobacteria (WWE3) as sibling groups to Microgenomates and  
 184 Doudnabacteria, Saccharibacteria, Berkelbacteria, Kazan and the Peregrinibacteria as sibling to,  
 185 or nested in, Parcubacteria. When the hierarchical clustering pattern from the y-axis of Figure 3A  
 186 is rendered in a radial tree format (Figure 3B) the correspondence between clusters based on the  
 187 distribution of core protein families and phylogeny (Figure 3C) is particularly apparent.

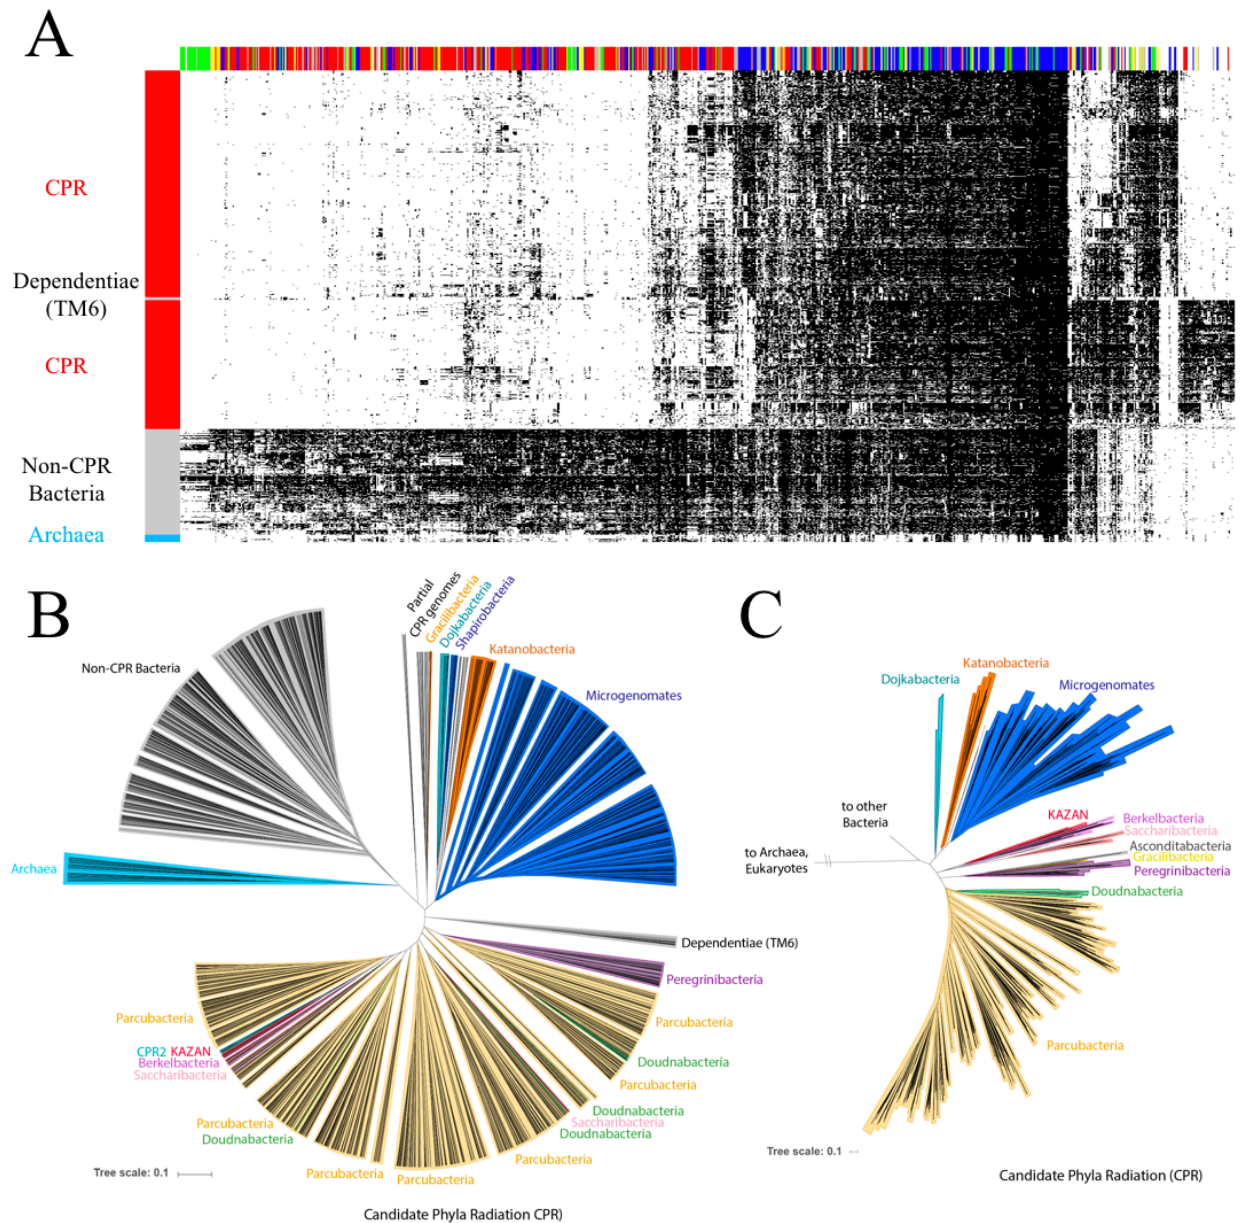

188



189 **Figure 3. (A) The distribution of 786 widely distributed protein families (columns) in 2890**  
190 **genomes (rows) from CPR bacteria (red), non-CPR bacteria (gray), and a few archaea (light**  
191 **blue) in a reference set with extensive sampling of genomes from metagenomes (thus includes**  
192 **sequences from many candidate phyla). Data are clustered based on the presence (black) /**  
193 **absence (white) profiles (Jaccard distance, complete linkage). Only near-complete and non-**  
194 **redundant genomes were used. The colored top bar corresponds to the functional category**  
195 **of families (Metabolism: red, Genetic Information Processing: blue, Cellular Processes:**  
196 **green, Environmental Information Processing: yellow, Organismal systems: orange,**  
197 **Unclassified: grey, Unknown: white). (B) Tree resulting from the hierarchical clustering of**  
198 **the genomes based on the distributions of proteins families in the panel A. (C) A phylogenetic**  
199 **tree of the CPR. Maximum-likelihood tree was calculated based on the concatenation of 14**  
200 **ribosomal proteins (L2, L3, L4, L5, L6, L14, L15, L18, L22, L24, S3, S8, S17, and S19) using**  
201 **the PROTCATLG model.**

202

203 The analysis present in Figures 2 and 3 used a genomic dataset that was notably enriched  
204 in CPR bacteria. To test whether the clear separation of CPR and non-CPR bacteria is an artifact  
205 of the choice of genomes, we created a second dataset of 2,729 of publicly available NCBI  
206 genomes sampled approximately at the level of one per genus (see Materials and Methods). The  
207 786 protein families were identified in this dataset and arrayed using the same approach as in  
208 Figure 3A (Figure 4A). The diagram clearly separates CPR from non-CPR bacteria and from  
209 archaea. Thus, we conclude that the major subdivision within the first dataset was not due to our  
210 choice of genomes or the environments they came from. Importantly, this NCBI genome dataset  
211 includes many genomes from symbionts with reduced genomes (McCutcheon and Moran, 2012).  
212 In no case did these genomes place within the CPR.

213 From the hierarchical clustering of the genomes in Figure 4 we generated a tree  
214 representation analogous to that in Figure 3B (Figure 4B). Again, the correspondence between  
215 genome clusters based on protein family distribution and phylogeny is striking. For example, the  
216 85 cyanobacterial genomes (bright green in Figure 4A) have a highly consistent pattern of  
217 presence/absence of core protein families and this is reflected in the comparatively short branch  
218 lengths in Figure 4B. In contrast, the branch lengths associated with the CPR bacteria are very  
219 long.

220 To evaluate branch length patterns through Figure 4B, we collapsed all branches that  
221 represented less than 0.25 of the maximum branch length (Figure 4C). In this rendering, the 99%  
222 of the Cyanobacteria collapse into a single wedge (84 out of 85). The CPR comprise 98 wedges,  
223 non-CPR bacteria 97 wedges and Archaea, 35 wedges. Notably, DPANN archaea cluster  
224 separately from other archaea, consistent with their phylogenetic separation in some analyses  
225 (Williams et al., 2017). The high representation of wedges of CPR relative to non-CPR bacteria is  
226 striking, given that CPR genomes represent only 11% of all genomes used in this analysis. We  
227 attribute this to high diversity in the subsets of core protein families present in genomes of  
228 organisms from across the CPR.

229 To test whether the protein clustering cutoffs strongly affected our results we performed  
230 another protein clustering without using cut-offs set during the HMM-HMM comparison (see  
231 Materials and Methods). This very inclusive procedure led to the definition of 3,555 clans (clusters  
232 of protein families that were identified in at least 5 distinct genomes). Despite merging of non-  
233 homologous proteins, we retrieved 537 clans that correspond to the 786 widespread families. Using  
234 this inclusive clustering, the CPR still separate from non-CPR bacteria and archaea in analyses  
235 that used both genome datasets (Figures S3 and S4). Thus, we conclude that, our results are robust  
236 regarding both genome selection (as tested using the NCBI genome dataset) and the protein  
237 clustering parameters.

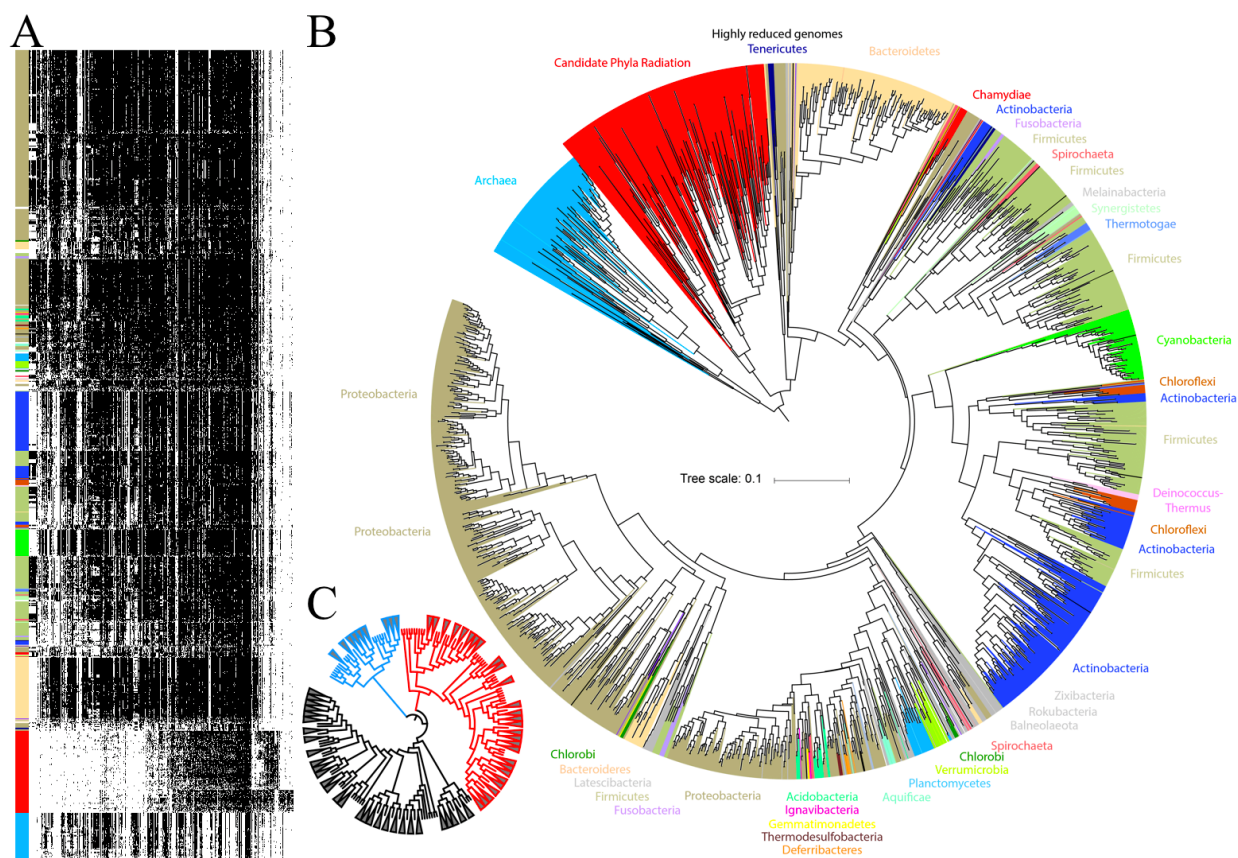

238  
 239 **Figure 4. (A) The distribution of 786 widely distributed protein families (columns) in 2,616**  
 240 **near-complete and non-redundant genomes (rows) from a reference set with extensive**  
 241 **sampling of genomes from non-CPR bacteria. Genomes are clustered based on the presence**  
 242 **(black) / absence (white) profiles (Jaccard distance, complete linkage). The order of the**  
 243 **families is the same as in Figure 3.A. (B) Tree resulting from the hierarchical clustering of**  
 244 **the genomes based on the distributions of proteins families in the panel A. (C) The same tree**  
 245 **with a collapsing of all branches that represented less than 25% of the maximum branch**  
 246 **length (CPR are in red, Archaea in blue and non-CPR bacteria in grey).**

247  
 248 Biological capacities explain the singularity of CPR

249  
 250 To explore the reasons for the genetic distinction of CPR from non-CPR bacteria and  
 251 archaea we divided the 786 protein families into three sets based on their abundances in CPR and  
 252 in non-CPR Bacteria (Figure 5A). A set of 246 families are equally distributed across the Bacteria  
 253 and 540 families are either depleted or enriched in CPR bacteria. The similarly distributed set

254 contains families mostly involved in informational processes, primarily in translation (Table S2).  
 255 The set of 453 families that are sparsely distributed in CPR yet very common in other Bacteria is  
 256 enriched in metabolic functions (Fig. 3A and 5A). The remaining 87 protein families enriched in  
 257 CPR and rare in non-CPR bacteria are discussed in detail below. Importantly, when these 87  
 258 protein families are removed from the set of widespread families and the analysis re-performed,  
 259 the CPR still separate from all other bacteria both genome datasets (Figures S5 and S6).

260 Although the CPR are distinct from non-CPR bacteria due to their sparse metabolism and  
 261 the presence of CPR-specific genes, they are not monolithic in terms of their metabolism (Figure  
 262 5C). For example, the genomes of the Peregrinibacteria encode far more metabolic families than  
 263 Shapirobacteria, Dojkabacteria and Gracilibacteria. Despite the comparatively high metabolic  
 264 gene inventory of the Peregrinibacteria, they have far fewer capacities than, for example,  
 265 Alphaproteobacteria (Figure 5C).

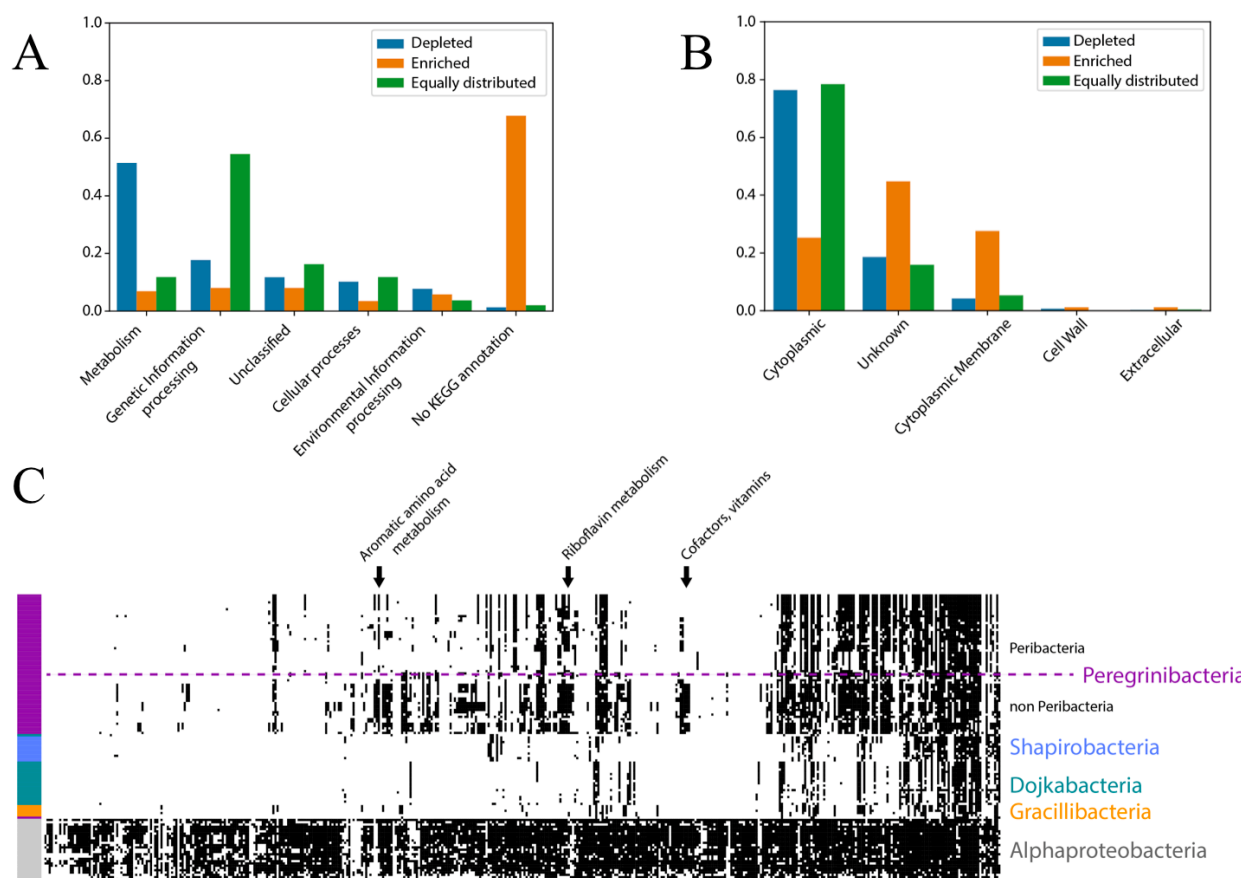

266  
 267 **Figure 5. (A) Barplots of the distributions of the functional categories of the 786 protein**  
 268 **families. (B) Barplots of the distributions of the cellular localizations of the 786 protein**

269 **families. (C) Distribution of the 453 families that are depleted in CPR across 126 genomes**  
270 **from Peregrinibacteria (62), Shapirobacteria (11), Dojkabacteria (20), Gracilibacteria (5)**  
271 **and Alphaproteobacteria (28). The dashed line separates classes within the**  
272 **Peregrinibacteria. The order of the families and the genomes is the same as in Figure 3A.**

273

274 Many novel protein families enriched in CPR are linked to pili and cell-cell interactions

275

276 As noted above, 87 protein families are enriched in the CPR relative to non-CPR bacteria  
277 (Figure 6 and Table S2). Notably, Dependientiae genomes encode few or none of the 87 CPR-  
278 enriched families, consistent with their phylogenetic placement outside of the CPR (Figure 6). The  
279 majority of the 87 families has poor functional annotations (Figure 5A and Table S2). However,  
280 51 families are comprised of proteins with at least one predicted transmembrane helix (Table S2),  
281 and many are predicted to have membrane or extracellular localizations (Figure 5B and Table S2).  
282 Fifteen have more than four transmembrane helices, and may be involved in transport (Table S2).

283 Interestingly, 28 of the 87 protein families are widespread in all CPR bacteria, the others  
284 are enriched in either Microgenomates (center, right side of Figure 6) or in Parcubacteria (center  
285 top in Figure 6). Those strongly associated with Microgenomates or Parcubacteria are primarily  
286 hypothetical proteins. However, 36 of 41 protein families enriched in Microgenomates are  
287 predicted to be non-cytoplasmic whereas 10 of 18 protein families enriched in Parcubacteria are  
288 predicted to be non-cytoplasmic (Table S2).

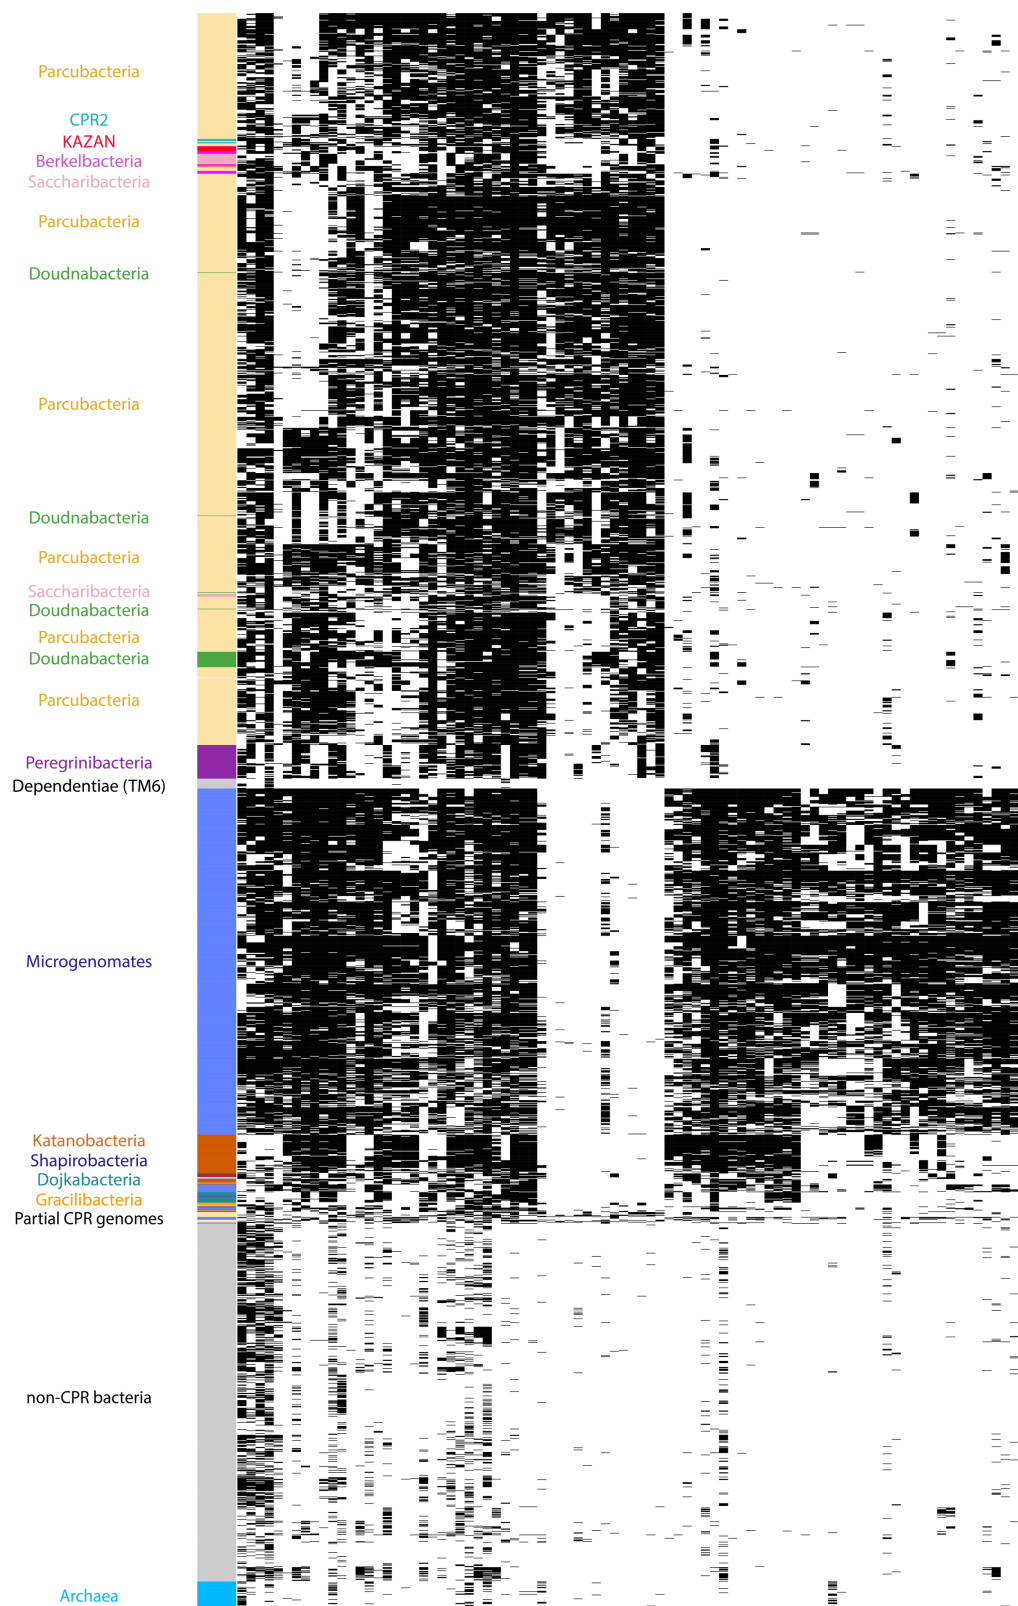

289

290 **Figure 6. Distribution of the 87 families that are enriched in CPR relative to non-CPR**

291 **Bacteria. The order of the families and the genomes is the same as in Figure 3A.**

292

293           Given that most CPR are predicted to depend on externally-derived nucleic acids, it is  
294 anticipated that their cells are competent (Wrighton et al., 2016). This capacity is not widespread  
295 in non-CPR bacteria (Chen and Dubnau, 2004). We identified two families (3.6k.fam00166 and  
296 3.6k.fam01878) annotated as ComEC (components of the DNA uptake machinery) among the 28  
297 widespread CPR-enriched families (Table S2). Two other components of DNA uptake machinery,  
298 ComFC/comFA (3.6k.fam03513) and DprA (3.6k.fam01708), are also widespread in CPR but they  
299 are also widespread in non-CPR Bacteria. The ComEA component involved in DNA binding is  
300 only present in around one third of CPR genomes, suggesting that some CPR may possess an  
301 alternative mechanism for DNA binding.

302           In competent bacteria, a correlation has been shown between the ability to take up  
303 exogenous DNA and the presence of pili on the cell surface (Stone and Kwaik, 1999). We found  
304 that three enriched and widespread families in CPR are divergent pilin proteins, the subunits of  
305 pili. These typically have a single transmembrane domain in their first 50 amino-acids (families  
306 3.6k.fam00087, 3.6k.fam00099, 3.6k.fam00143) (Giltner et al., 2012). These pilin proteins are  
307 part a type IV pili (T4P) system that includes other components that are encoded in the genomes  
308 of CPR bacteria but also present in non-CPR Bacteria (Melville and Craig, 2013). These  
309 components comprise the ATPase assembly PilB (3.6k.fam04160), the ATPase twitching motility  
310 PilT (3.6k.fam00968), the membrane platform PilC (3.6k.fam00031), the prepilin peptidase PilD  
311 (3.6k.fam02501) and finally the Gspl domain PilM (3.6k.fam00032). All of these components co-  
312 localize in several CPR genomes. Importantly we did not find the PilQ component which is  
313 required to extrude the pilus filament across the outer membrane of gram negative Bacteria (Chen  
314 and Dubnau, 2004), consistent with the microscopy observations that suggest CPR do not have a  
315 gram negative cell envelope (Luef et al., 2015).

316           Full-length type IV pilin precursors are secreted by the Sec pathway in unfolded states in  
317 gram positive bacteria (Giltner et al., 2012). A thiol-disulfide oxidoreductase (3.6k.fam00998) is  
318 one of the protein families enriched in CPR bacteria and may be involved in ensuring correct  
319 folding of the pilins. These proteins show similarity to membrane-bound oxidoreductase MdbA,  
320 which is found in the gram positive *Actinomyces oris* (Reardon-Robinson et al., 2015a) and  
321 *Corynebacterium diphtheriae* (Reardon-Robinson et al., 2015b). In these organisms, MdbA  
322 catalyzes disulfide bond formation in secreted proteins, a reaction that is important for protein

323 stability and function (Reardon-Robinson and Ton-That, 2016). In *Actinomyces oris*, one of these  
324 secreted proteins is the FimA pilin (Reardon-Robinson et al., 2015a). Similarly to MdbA, 59% of  
325 the proteins from the family 3.6k.fam00998 are predicted to be anchored in the cell wall and the  
326 catalytic CxxC motif required for disulfide bond formation is conserved in 3223 of 3496 (92%)  
327 CPR proteins. Interestingly, the family of proteins most frequently found in genomes adjacent to  
328 proteins of 3.6k.fam00998 in CPR bacteria is the Vitamin K epoxide reductase (VKOR, adjacent  
329 in 76 CPR genomes). VKOR re-oxidizes MdbA in *Actinomyces oris* (Luong et al., 2017).

330 Another interesting protein family with one or more transmembrane segments  
331 (3.6k.fam08817) that is widespread and almost unique to CPR organisms possesses a CAP domain  
332 (Cysteine-rich secretory proteins, Antigen 5, and Pathogenesis-related 1 proteins). The CAP  
333 domains are found in diverse extracellular proteins of bacteria and eukaryotes and have a wide  
334 range of physiological activities including fungal virulence, cellular defense and immune evasion  
335 (Gibbs et al., 2008). Some members of this family are endopeptidases, some are transglycosylases  
336 or have non-enzymatic roles. Many other CPR-enriched families were identified but lack confident  
337 functional predictions (Table S2).

338

339



## 340 **Discussion**

341           Genome-resolved metagenomics studies have greatly expanded our understanding of  
342 microbial life, particularly through discovery of new bacterial lineages (candidate phyla). Lacking  
343 have been studies that investigate these genomes from the perspective of the diversity and  
344 distribution patterns of homologous proteins. To begin comparing protein sequence inventories,  
345 we clustered the amino acid sequences into families that approximate homologous groups. These  
346 families serve as a common language that enables comparison of gene inventories within and  
347 among lineages. Strikingly, the combinations of protein families associated with widespread  
348 biological capacities separate the CPR from all other bacteria. In other words, the pattern of  
349 presence/absence of relatively widely distributed protein families highlights a major dichotomy  
350 within Domain Bacteria that corresponds almost exactly to the subdivision inferred based on  
351 phylogenetic analyses (both rRNA and concatenations of ribosomal proteins) (Hug et al., 2016).

352           One potential explanation for the phylogenetic separation of CPR bacteria from other  
353 bacteria is that the radiation is comprised of fast-evolving symbionts. If this was the case, then we  
354 might predict that other fast evolving bacterial symbionts (e.g., those associated with insects,  
355 Chlamydia, Mollicutes and other bacteria with highly reduced genomes) would cluster  
356 phylogenetically with the CPR. This is not the case. The separation based on presence/absence  
357 patterns persists even when the analysis is redone without inclusion of the CPR-enriched families.  
358 Perhaps even more importantly, CPR bacteria separate from other bacteria, including other  
359 bacterial symbionts, based on essentially CPR-specific genes. The near ubiquity of 87 protein  
360 families across the CPR radiation is most readily explained by early acquisition at the time of the  
361 origin of CPR, with persistence via vertical inheritance.

362           Based on the functional predictions, the protein families that are highly enriched in CPR  
363 and rare or absent in other bacteria may be important for interaction between CPR and their hosts.  
364 Among them, the type IV pili may be central to CPR associations with other organisms. These  
365 molecular machines confer a broad range of functions from locomotion, adherence to host cells,  
366 DNA uptake, protein secretion and environmental sensing (Maier and Wong, 2015). Prominent  
367 among this set are three novel pilin protein families that may have evolved in CPR bacteria.  
368 Notably, several other groups of CPR-enriched genes are also predicted to function in DNA uptake  
369 and maintenance of pilin structure. Given the overall small genome size, these findings reinforce

370 the conclusion that genes for organism-organism interaction are central to the lifestyles of CPR  
371 bacteria.

372         Similar to CPR bacteria, phylum-level groups of non-CPR bacteria also have unique sets  
373 of core genes. For example, Cyanobacteria group together tightly despite the fact that genes for  
374 the physiological trait that unites them, oxygenic photosynthesis, were not included in the protein  
375 family analysis. This may be a reflection of the requirement for a specific combination of core  
376 protein families that comprise a platform that is consistent with photosynthetic lifestyles. Similar  
377 explanations are less easily identified for the general correspondence of phylogeny and conserved  
378 protein family sets in other major groups. However, a general explanation may be that once an  
379 innovation that gave rise to a lineage occurred, strong selection maintained the core protein family  
380 platform set that supports it.

381         Within the CPR we identified many clusters of bacteria that share similar core metabolic  
382 platforms. Some CPR bacterial phyla have extensive biosynthetic capacities whereas others have  
383 minimal sets of core protein families. This may indicate extensive gene loss in some groups. Given  
384 the overall phylum-level consistency of the protein family sets, we suspect that major genome  
385 reduction events were ancient.

386         Looking across the entire analysis, the broad consistency in combinations of core protein  
387 families within lineages strongly suggests that the distribution of these families is primarily the  
388 result of vertical inheritance. Specifically, the patterns of protein family distribution reproduce the  
389 subdivision of Bacteria from Archaea and essentially recapitulate many phylum and sub-phylum  
390 groupings. Collapsing the branches in the cladogram formed from the hierarchical clustering of  
391 protein families revealed enormous branch length in the CPR. We interpret this to indicate huge  
392 variation in the sets of core protein families across the CPR (Figure 4C). This diversity in the core  
393 protein family platform may have arisen because distinct types of symbiotic associations select for  
394 larger or lesser requirement for core biosynthetic capacities in the symbiont. In this case, major  
395 divergences within the CPR, essentially the rise of new CPR phyla, may have been stimulated by  
396 evolutionary innovations that generated new lineages of potential bacterial hosts.

397         The relative magnitude of diversity of distinct core gene sets in the CPR compared to non-  
398 CPR bacteria is consistent in scale with the relative magnitude of phylogenetic diversity of these  
399 groups, as rendered in ribosomal RNA and protein trees (Hug et al., 2016). This suggests the  
400 enormous biological importance of the CPR, regardless of the extent to which their phylogenetic

401 and core metabolic diversity is a reflection of gene loss, rapid evolution or ancient origin within  
402 the bacterial domain.  
403  
404

## 405 **Materials and Methods.**

406

### 407 Datasets construction

408         The initial dataset contains 3,598 prokaryotic genomes (5,061,957 proteins) that were  
409 retrieved from 4 published datasets (Anantharaman et al., 2016; Brown et al., 2015; Castelle et al.,  
410 2015; Probst et al., 2017). The dataset encompasses 2,321 CPR (1,953,651 proteins); 1,198 non-  
411 CPR-Bacteria (3,018,597 proteins) and 79 Archaea (89,709 proteins) (Table S3). The second  
412 “NCBI” dataset contains 2,729 genomes (8,425,478 proteins). Genome were chosen based on the  
413 taxonomy provided by the NCBI. Briefly, for each prokaryotic phylum, one genome per genus  
414 was randomly selected from the NCBI genome database (last access on December, 2017). Some  
415 genomes do not have genus assignment although they have a phylum assignment. In those cases,  
416 5 genomes per phylum were randomly selected. Refseq were preferred to non-refseq genomes as  
417 these are generally better annotated. The NCBI dataset encompasses 282 CPR (217,728 proteins);  
418 2,278 non-CPR-Bacteria (7,811,207 proteins) and 169 Archaea (396,543 proteins) (Table S3).

419

### 420 Protein clustering

421         Proteins with  $\geq 90\%$  identity were clustered using CD-HIT (Fu et al., 2012) to remove  
422 nearly identical proteins and protein fragments, and representatives of each cluster were used in  
423 downstream protein clustering. All vs. all local searches were performed using usearch (Edgar,  
424 2010) with -ublast and -evalue 0.0001 parameters, and the bit-score was used for MCL (Markov  
425 Clustering algorithm) (Enright et al., 2002), with 2.0 as the inflation parameter. Each of the  
426 resulting clusters that included at least 5 representative proteins was sub-clustered based on global  
427 percent identity. This was achieved by performing an all vs. all search within the members of the  
428 cluster with usearch64 -search\_global and performing MCL based on percent identity (with -I 2.0).  
429 The resulting sub-clusters were defined as sub-families. In order to test for highly similar sub-  
430 families, we grouped sub-families into protein families as follows. The proteins of each sub-family  
431 were aligned using MAFFT (Katoh and Standley, 2013), and from the alignments HHM models  
432 were built using the HHpred suite (Soding, 2005). The sub-families were then compared to each  
433 other using hhblits (Remmert et al., 2011) from the HHpred suite (with parameters -v 0 -p 50 -z 4  
434 -Z 32000 -B 0 -b 0). For sub-families with probability scores of  $\geq 99\%$  and coverage  $\geq 0.75$ , a  
435 similarity score (probability  $\times$  coverage) was used in the final MCL (-I 2.0). These clusters were

436 defined as the protein families, after adding to each representative highly similar proteins that were  
437 removed in the first CD-HIT step. The clans were defined by clustering all sub-families using  
438 MCL based on the probability  $\times$  coverage score (without using the cutoffs of probability and  
439 coverage used for the protein family clustering).

440

#### 441 Selection of widespread families.

442 Examining the distribution of the protein families across the genomes, a clear modular  
443 organization emerged (Figure 2. Panel A). We used the Louvain algorithm (Blondel et al., 2008)  
444 to detect modules of proteins that share similar patterns of presence/absence across the genomes.  
445 Briefly, The Louvain algorithm seeks a partition of a network that maximizes the modularity index  
446  $Q$ . The algorithm was performed on a weighted network that was built by connecting family nodes  
447 sharing a Jaccard index greater than 0.5. For each pair of protein families, the Jaccard index was  
448 calculated based on their profiles of presence/absence across the genomes. The 0.5 threshold was  
449 empirically chosen because it defined 3 distinct modules for widespread proteins in Archaea, non-  
450 CPR-Bacteria and Bacteria (see Figure 2A) whereas lower thresholds merged families having  
451 distinct presence/absence patterns across the genomes. This procedure defined modules with more  
452 than 10 proteins.

453 For each module, the genomes with that module were identified and their phylum  
454 affiliations determined. Briefly, for each module, the median number of genomes per family ( $m$ )  
455 was calculated. The  $m$  genomes that contains the biggest number of proteins were retained; their  
456 phyla distribution defines the taxonomic assignment of the module.

457

#### 458 Genome completeness assessment and de-replication.

459 Genome completeness and contamination were estimated based on the presence of single-  
460 copy genes (SCGs) as described in (Anantharaman et al., 2016). For CPR, 43 universal SCGs were  
461 used, following (Anantharaman et al., 2016). In non-CPR bacteria, genome completeness was  
462 estimated using 51 SCGs, following (Anantharaman et al., 2016). For archaea, 38 SCGs were used,  
463 following (Anantharaman et al., 2016). Genomes with completeness  $> 70\%$  and contamination  $<$   
464  $10\%$  (based on duplicated copies of the SCGs) were considered as near-complete genomes.  
465 Genomes were de-replicated using dRep (Olm et al., 2017) (version v2.0.5 with ANI  $> 95\%$ ). The  
466 most complete genome per cluster was used in downstream analyses.

467

468 Functional annotation

469 Protein sequences were functionally annotated based on the accession of their best  
470 Hmsearch match (version 3.1) (E-value cut-off 0.001) (Eddy, 1998) against an HMM database  
471 constructed based on ortholog groups defined by the KEGG (Kanehisa et al., 2016) (downloaded  
472 on June 10, 2015) . Domains were predicted using the same Hmsearch procedure against the  
473 Pfam database (version 31.0) (Punta et al., 2012). The domain architecture of each protein  
474 sequence was predicted using the DAMA software (default parameters) (Bernardes et al., 2016).  
475 SIGNALP (version 4.1) (parameters: -f short -t gram+) (Petersen et al., 2011) and PSORT (version  
476 3.0) (parameters: --long --positive) (Peabody et al., 2016) were used to predict the putative cellular  
477 localization of the proteins. Prediction of transmembrane helices in proteins was performed using  
478 TMHMM (version 2.0) (default parameters) (Krogh et al., 2001).

479

480 Enrichment analysis.

481 Enrichment/depletion of protein families was calculated based on the frequency of the  
482 computed protein families in UniProt's Reference Proteome database (downloaded April 17,  
483 2017). First, a database of all HMMs of the sub-families was used to identify members of each  
484 sub-family in the Reference Proteomes from CPR and non-CPR bacteria. Additionally, HMM  
485 representing 16 single copy ribosomal genes were used to identify those proteins. The enrichment  
486 of each family in CPR vs. non-CPR bacteria was then computed using a Fisher exact test, in which  
487 the expected values were the count of single copy ribosomal genes in CPR and non-CPR, and the  
488 observed values were the counts of members of each protein families in CPR and non-CPR  
489 bacteria. Families were considered enriched or depleted if their p-values, after correction for false  
490 detection rate, were significant ( $< 10^{-5}$ ) and if their odd ratio were  $> 2$ . The remaining families  
491 were assigned as equally distributed.

492

493 **Acknowledgments**

494 Support was provided by grants from the Lawrence Berkeley National Laboratory's Genomes-to-  
495 Watershed Scientific Focus Area. The U.S. Department of Energy (DOE), Office of Science, and  
496 Office of Biological and Environmental Research funded the work under contract DE-AC02-  
497 05CH11231 and the DOE carbon cycling program DOE-SC10010566, the Innovative Genomics  
498 Institute at Berkeley and the Chan Zuckerberg Biohub. D.B. was supported by a long-term EMBO  
499 fellowship

500

501 **Author Contributions**

502 RM, DB, CC and JB designed the analysis. DB assembled the initial dataset and performed the  
503 protein clustering. RM detected the widespread families and created the binary matrix. RM  
504 performed the functional analysis. CC performed the phylogenetic tree. All authors contributed to  
505 the analysis of the data and the interpretation of the results. All authors wrote the manuscript. All  
506 authors read and approved the final manuscript.

507

508 **Declaration of Interests**

509 The authors declare no competing interests.

510

511 **Deposited data**

512 All genomes used in the analysis are publicly available (see Table S3). The fasta sequences of the  
513 786 families and the binary matrix used to create the figures 2, 3 and 4 are available at  
514 <https://doi.org/10.6084/m9.figshare.6296987.v1>.

515

516

517 **References**

- 518 Anantharaman, K., Brown, C.T., Hug, L.A., Sharon, I., Castelle, C.J., Probst, A.J., Thomas,  
519 B.C., Singh, A., Wilkins, M.J., Karaoz, U., et al. (2016). Thousands of microbial genomes shed  
520 light on interconnected biogeochemical processes in an aquifer system. *Nat. Commun.* 7, 13219.
- 521 Bernardes, J.S., Vieira, F.R.J., Zaverucha, G., and Carbone, A. (2016). A multi-objective  
522 optimization approach accurately resolves protein domain architectures. *Bioinformatics* 32, 345–  
523 353.
- 524 Blondel, V.D., Guillaume, J.-L., Lambiotte, R., and Lefebvre, E. (2008). Fast unfolding of  
525 communities in large networks.
- 526 Brown, C.T., Hug, L.A., Thomas, B.C., Sharon, I., Castelle, C.J., Singh, A., Wilkins, M.J.,  
527 Wrighton, K.C., Williams, K.H., and Banfield, J.F. (2015). Unusual biology across a group  
528 comprising more than 15% of domain Bacteria. *Nature advance on.*
- 529 Castelle, C.J., and Banfield, J.F. (2018). Major New Microbial Groups Expand Diversity and  
530 Alter our Understanding of the Tree of Life. *Cell* 172, 1181–1197.
- 531 Castelle, C.J., Wrighton, K.C., Thomas, B.C., Hug, L.A., Brown, C.T., Wilkins, M.J.,  
532 Frischkorn, K.R., Tringe, S.G., Singh, A., Markillie, L.M., et al. (2015). Genomic expansion of  
533 domain archaea highlights roles for organisms from new phyla in anaerobic carbon cycling.  
534 *Curr. Biol.* 25, 690–701.
- 535 Chen, I., and Dubnau, D. (2004). DNA uptake during bacterial transformation. *Nat. Rev.*  
536 *Microbiol.* 2, 241–249.
- 537 Danczak, R.E., Johnston, M.D., Kenah, C., Slattery, M., Wrighton, K.C., and Wilkins, M.J.  
538 (2017). Members of the Candidate Phyla Radiation are functionally differentiated by carbon- and  
539 nitrogen-cycling capabilities. *Microbiome* 5, 112.
- 540 Dudek, N.K., Sun, C.L., Burstein, D., Kantor, R.S., Aliaga Goltsman, D.S., Bik, E.M., Thomas,  
541 B.C., Banfield, J.F., and Relman, D.A. (2017). Novel Microbial Diversity and Functional  
542 Potential in the Marine Mammal Oral Microbiome. *Curr. Biol.* 27, 3752–3762.e6.
- 543 Eddy, S. (1998). Profile hidden Markov models. *Bioinformatics* 14, 755–763.
- 544 Edgar, R.C. (2010). Search and clustering orders of magnitude faster than BLAST.  
545 *Bioinformatics* 26, 2460–2461.
- 546 Enright, A.J., Van Dongen, S., and Ouzounis, C.A. (2002). An efficient algorithm for large-scale  
547 detection of protein families. *Nucleic Acids Res.* 30, 1575–1584.



- 548 Fu, L., Niu, B., Zhu, Z., Wu, S., and Li, W. (2012). CD-HIT: accelerated for clustering the next-  
549 generation sequencing data. *Bioinformatics* 28, 3150–3152.
- 550 Gibbs, G.M., Roelants, K., and O’Bryan, M.K. (2008). The CAP Superfamily: Cysteine-Rich  
551 Secretory Proteins, Antigen 5, and Pathogenesis-Related 1 Proteins—Roles in Reproduction,  
552 Cancer, and Immune Defense. *Endocr. Rev.* 29, 865–897.
- 553 Giltner, C.L., Nguyen, Y., and Burrows, L.L. (2012). Type IV Pilin Proteins: Versatile  
554 Molecular Modules. *Microbiol. Mol. Biol. Rev.* 76, 740–772.
- 555 Gong, J., Qing, Y., Guo, X., and Warren, A. (2014). “Candidatus *Sonnebornia*  
556 *yantaiensis*”, a member of candidate division OD1, as intracellular bacteria of the ciliated  
557 protist *Paramecium bursaria* (Ciliophora, Oligohymenophorea). *Syst. Appl. Microbiol.* 37, 35–  
558 41.
- 559 He, X., McLean, J.S., Edlund, A., Yooseph, S., Hall, A.P., Liu, S.-Y., Dorrestein, P.C.,  
560 Esquenazi, E., Hunter, R.C., Cheng, G., et al. (2015). Cultivation of a human-associated TM7  
561 phylotype reveals a reduced genome and epibiotic parasitic lifestyle. *Proc. Natl. Acad. Sci. U. S.*  
562 *A.* 112, 244–249.
- 563 Hug, L.A., Baker, B.J., Anantharaman, K., Brown, C.T., Probst, A.J., Castelle, C.J., Butterfield,  
564 C.N., HERNSDORF, A.W., Amano, Y., Ise, K., et al. (2016). A new view of the tree of life. *Nat.*  
565 *Microbiol.* 1, 16048.
- 566 Kanehisa, M., Sato, Y., Kawashima, M., Furumichi, M., and Tanabe, M. (2016). KEGG as a  
567 reference resource for gene and protein annotation. *Nucleic Acids Res.* 44, D457–D462.
- 568 Katoh, K., and Standley, D.M. (2013). MAFFT multiple sequence alignment software version 7:  
569 improvements in performance and usability. *Mol. Biol. Evol.* 30, 772–780.
- 570 Krogh, A., Larsson, B., von Heijne, G., and Sonnhammer, E.L.. (2001). Predicting  
571 transmembrane protein topology with a hidden markov model: application to complete  
572 genomes<sup>1</sup>Edited by F. Cohen. *J. Mol. Biol.* 305, 567–580.
- 573 Luef, B., Frischkorn, K.R., Wrighton, K.C., Holman, H.-Y.N., Birarda, G., Thomas, B.C., Singh,  
574 A., Williams, K.H., Siegerist, C.E., Tringe, S.G., et al. (2015). Diverse uncultivated ultra-small  
575 bacterial cells in groundwater. *Nat. Commun.* 6, 6372.
- 576 Luong, T.T., Reardon-Robinson, M.E., Siegel, S.D., and Ton-That, H. (2017). Reoxidation of the  
577 Thiol-Disulfide Oxidoreductase MdbA by a Bacterial Vitamin K Epoxide Reductase in the  
578 Biofilm-Forming Actinobacterium *Actinomyces oris*. *J. Bacteriol.* 199, e00817-16.

- 579 Maier, B., and Wong, G.C.L. (2015). How Bacteria Use Type IV Pili Machinery on Surfaces.  
580 *Trends Microbiol.* *23*, 775–788.
- 581 McCutcheon, J.P., and Moran, N.A. (2012). Extreme genome reduction in symbiotic bacteria.  
582 *Nat. Rev. Microbiol.* *10*, 13–26.
- 583 Melville, S., and Craig, L. (2013). Type IV Pili in Gram-Positive Bacteria. *Microbiol. Mol. Biol.*  
584 *Rev.* *77*, 323–341.
- 585 Olm, M.R., Brown, C.T., Brooks, B., and Banfield, J.F. (2017). dRep: a tool for fast and accurate  
586 genomic comparisons that enables improved genome recovery from metagenomes through de-  
587 replication. *ISME J.* *11*, 2864–2868.
- 588 Orsi, W.D., Richards, T.A., and Francis, W.R. (2017). Predicted microbial secretomes and their  
589 target substrates in marine sediment. *Nat. Microbiol.*
- 590 Parks, D.H., Rinke, C., Chuvochina, M., Chaumeil, P.-A., Woodcroft, B.J., Evans, P.N.,  
591 Hugenholtz, P., and Tyson, G.W. (2017). Recovery of nearly 8,000 metagenome-assembled  
592 genomes substantially expands the tree of life. *Nat. Microbiol.*
- 593 Peabody, M.A., Laird, M.R., Vlasschaert, C., Lo, R., and Brinkman, F.S.L. (2016). PSORTdb:  
594 expanding the bacteria and archaea protein subcellular localization database to better reflect  
595 diversity in cell envelope structures. *Nucleic Acids Res.* *44*, D663-8.
- 596 Petersen, T.N., Brunak, S., von Heijne, G., and Nielsen, H. (2011). SignalP 4.0: discriminating  
597 signal peptides from transmembrane regions. *Nat. Methods* *8*, 785–786.
- 598 Price, M.N., Dehal, P.S., and Arkin, A.P. (2009). FastTree: computing large minimum evolution  
599 trees with profiles instead of a distance matrix. *Mol. Biol. Evol.* *26*, 1641–1650.
- 600 Probst, A.J., Castelle, C.J., Singh, A., Brown, C.T., Anantharaman, K., Sharon, I., Hug, L.A.,  
601 Burstein, D., Emerson, J.B., Thomas, B.C., et al. (2017). Genomic resolution of a cold  
602 subsurface aquifer community provides metabolic insights for novel microbes adapted to high  
603 CO<sub>2</sub> concentrations. *Environ. Microbiol.* *19*, 459–474.
- 604 Punta, M., Coggill, P.C., Eberhardt, R.Y., Mistry, J., Tate, J., Boursnell, C., Pang, N., Forslund,  
605 K., Ceric, G., Clements, J., et al. (2012). The Pfam protein families database. *Nucleic Acids Res.*  
606 *40*, D290-301.
- 607 Reardon-Robinson, M.E., and Ton-That, H. (2016). Disulfide-Bond-Forming Pathways in Gram-  
608 Positive Bacteria. *J. Bacteriol.* *198*, 746–754.
- 609 Reardon-Robinson, M.E., Osipiuk, J., Chang, C., Wu, C., Jooya, N., Joachimiak, A., Das, A.,

610 and Ton-That, H. (2015a). A Disulfide Bond-forming Machine Is Linked to the Sortase-mediated  
611 Pilus Assembly Pathway in the Gram-positive Bacterium *Actinomyces oris*. *J. Biol. Chem.* *290*,  
612 21393–21405.

613 Reardon-Robinson, M.E., Osipiuk, J., Jooya, N., Chang, C., Joachimiak, A., Das, A., and Ton-  
614 That, H. (2015b). A thiol-disulfide oxidoreductase of the Gram-positive pathogen  
615 *Corynebacterium diphtheriae* is essential for viability, pilus assembly, toxin production and  
616 virulence. *Mol. Microbiol.* *98*, 1037–1050.

617 Remmert, M., Biegert, A., Hauser, A., and Söding, J. (2011). HHblits: lightning-fast iterative  
618 protein sequence searching by HMM-HMM alignment. *Nat. Methods* *9*, 173–175.

619 Rinke, C., Schwientek, P., Sczyrba, A., Ivanova, N.N., Anderson, I.J., Cheng, J.-F., Darling, A.,  
620 Malfatti, S., Swan, B.K., Gies, E.A., et al. (2013). Insights into the phylogeny and coding  
621 potential of microbial dark matter. *Nature* *499*, 431–437.

622 Soding, J. (2005). Protein homology detection by HMM-HMM comparison. *Bioinformatics* *21*,  
623 951–960.

624 Starr, E.P., Shi, S., Blazewicz, S.J., Probst, A.J., Herman, D.J., Firestone, M.A., and Banfield,  
625 J.F. (2017). Stable isotope informed genome-resolved metagenomics reveals that  
626 *Saccharibacteria* utilize microbially processed plant derived carbon. *BioRxiv* 211649.

627 Stone, B.J., and Kwai, Y.A. (1999). Natural competence for DNA transformation by *Legionella*  
628 *pneumophila* and its association with expression of type IV pili. *J. Bacteriol.* *181*, 1395–1402.

629 Williams, T.A., Szöllősi, G.J., Spang, A., Foster, P.G., Heaps, S.E., Boussau, B., Ettema, T.J.G.,  
630 and Embley, T.M. (2017). Integrative modeling of gene and genome evolution roots the archaeal  
631 tree of life. *Proc. Natl. Acad. Sci.* 201618463.

632 Wrighton, K.C., Thomas, B.C., Sharon, I., Miller, C.S., Castelle, C.J., VerBerkmoes, N.C.,  
633 Wilkins, M.J., Hettich, R.L., Lipton, M.S., Williams, K.H., et al. (2012). Fermentation,  
634 hydrogen, and sulfur metabolism in multiple uncultivated bacterial phyla. *Science* *337*, 1661–  
635 1665.

636 Wrighton, K.C., Castelle, C.J., Varaljay, V.A., Satagopan, S., Brown, C.T., Wilkins, M.J.,  
637 Thomas, B.C., Sharon, I., Williams, K.H., Tabita, F.R., et al. (2016). RubisCO of a nucleoside  
638 pathway known from Archaea is found in diverse uncultivated phyla in bacteria. *ISME J.* *10*,  
639 2702–2714.

640

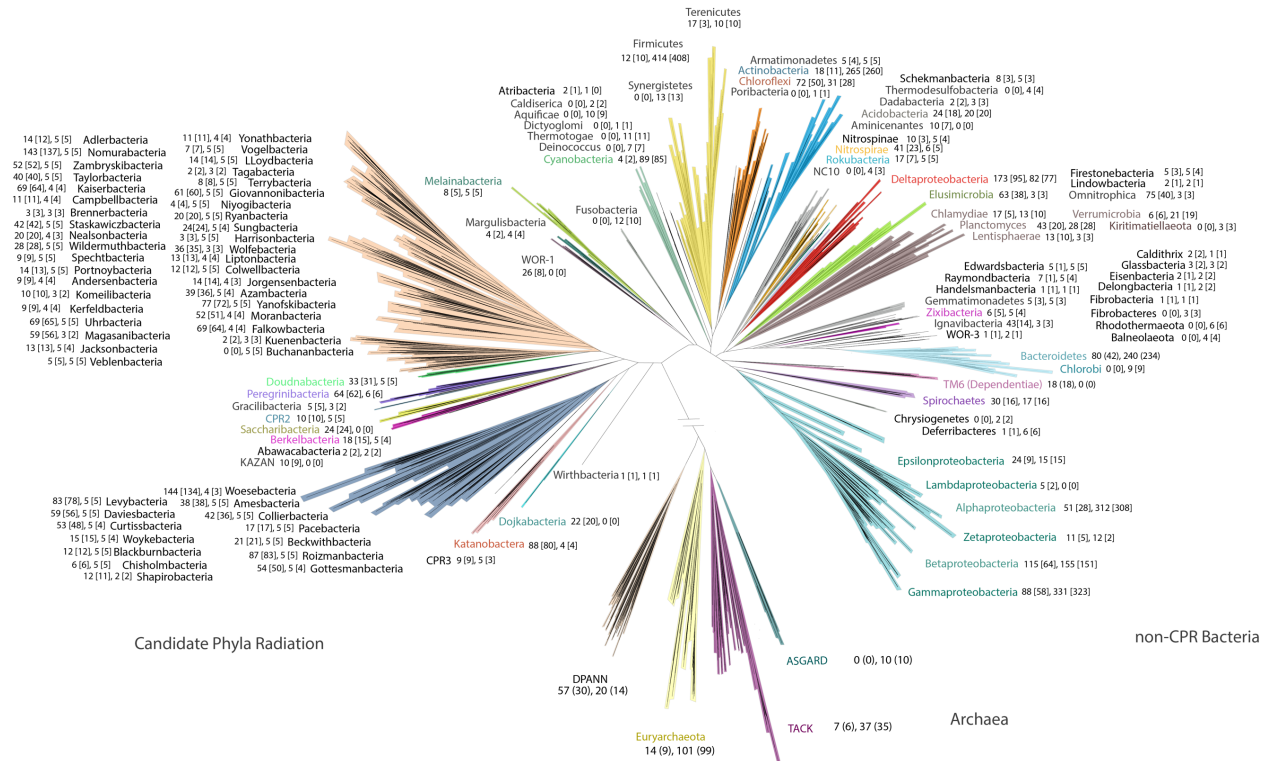

641  
 642 Figure S1. Tree illustrating phylogenetic sampling used in this study (the diagram is based on a  
 643 tree published recently in (Castelle and Banfield, 2018)). For each phylum, the number of genomes  
 644 and near-complete genomes (square brackets) is reported for the two datasets.  
 645

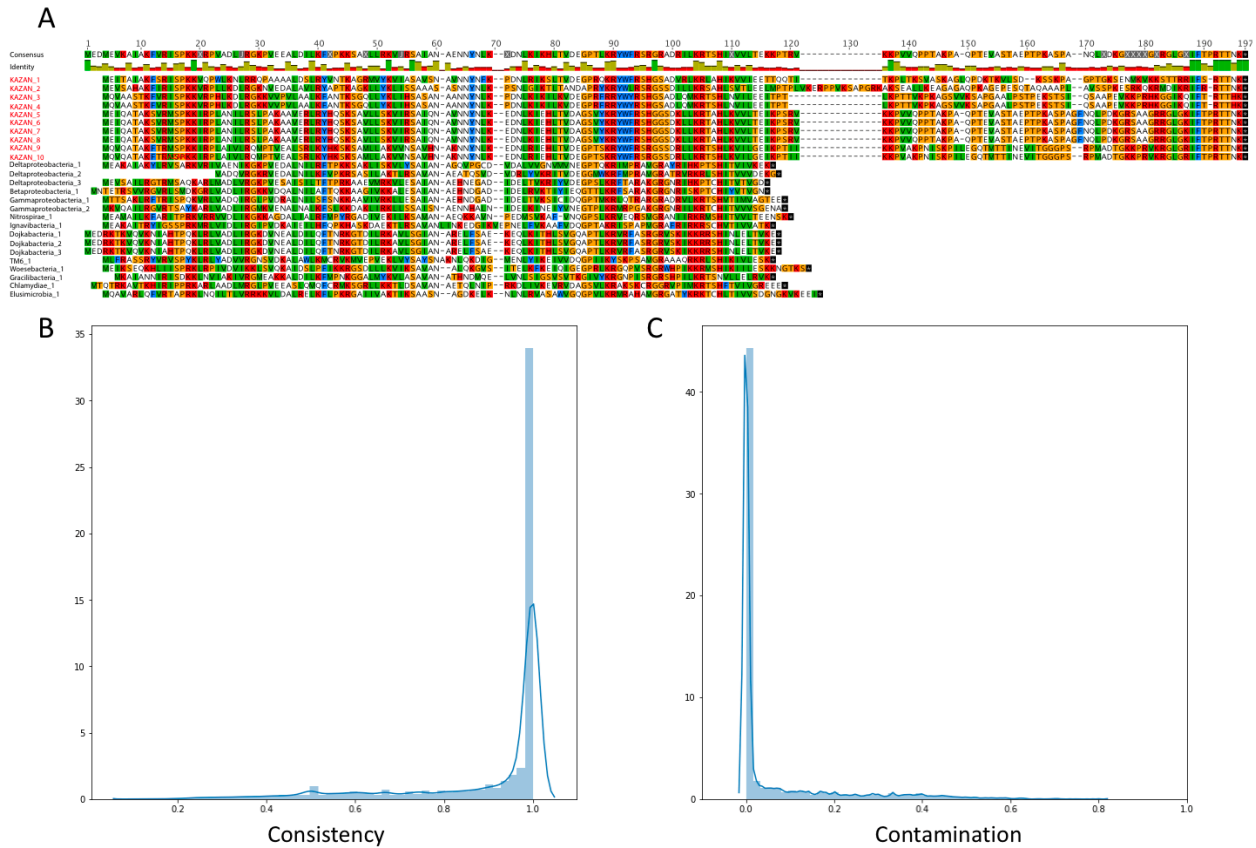

646  
647

648 Figure S2. Quality assessment of the protein clustering. A. A multiple sequences alignment (MSA)  
649 of the 10 protein sequences from the family 3.6k.fam10722 (names in red) and 16 proteins  
650 sequences from the family 3.6k.fam00371 (names in black). The MSA highlights the extension of  
651 the C-terminal region of proteins from the family 3.6k.fam10722. B. Histogram of the ratios of the  
652 most abundant KEGG accessions that are present in the most abundant families. C. Histogram of  
653 the ratios of admixture for each family.

654

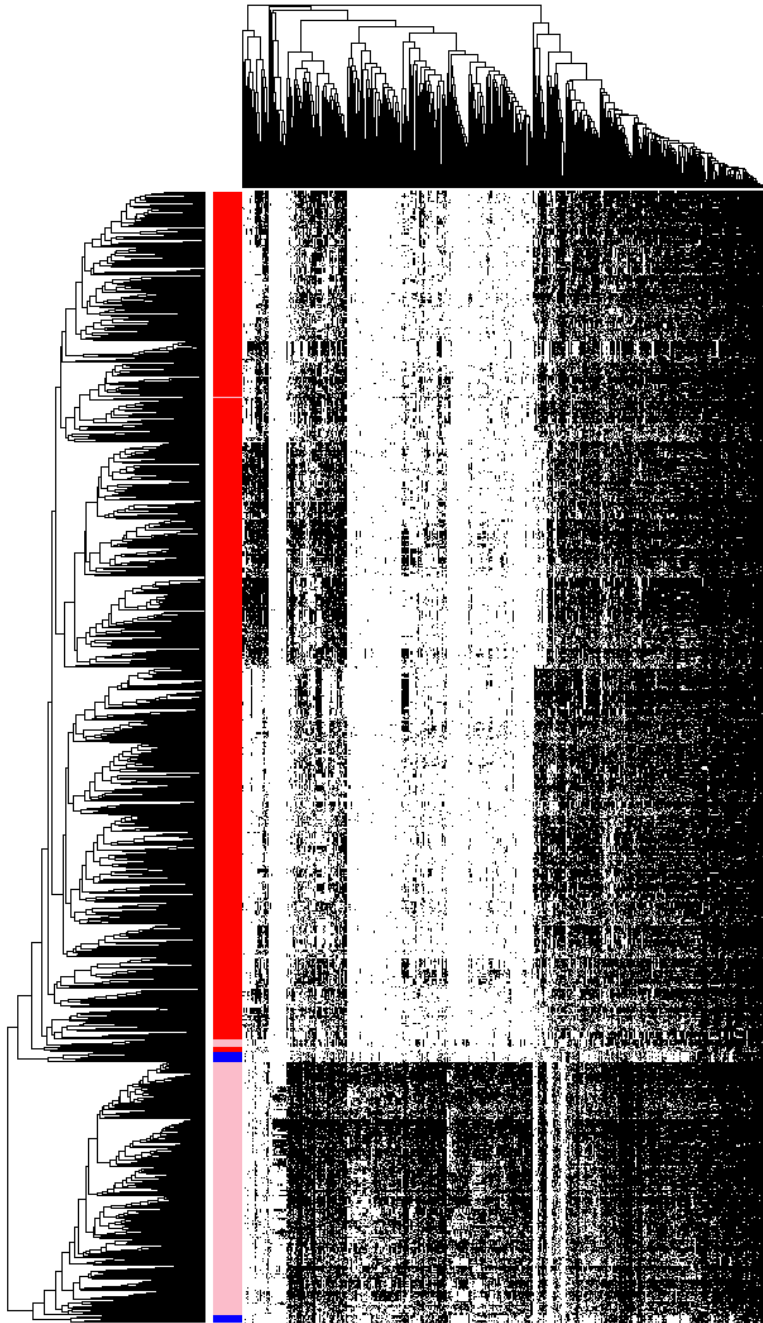

655  
656 Figure S3. The distribution of widely distributed 537 protein clans (columns) in 2890 genomes  
657 (rows) from CPR bacteria (red), non-CPR bacteria (pink), and a few archaea (blue) in a reference  
658 set with extensive sampling of genomes from metagenomes (thus includes sequences from many  
659 candidate phyla). Data are clustered based on the presence (black) / absence (white) profiles  
660 (Jaccard distance, complete linkage). Only near-complete and non-redundant genomes were  
661 showed. The non-CPR bacteria genomes (in pink) that are nested in the CPR (in red) correspond  
662 to the dependentiae (TM6) genomes.

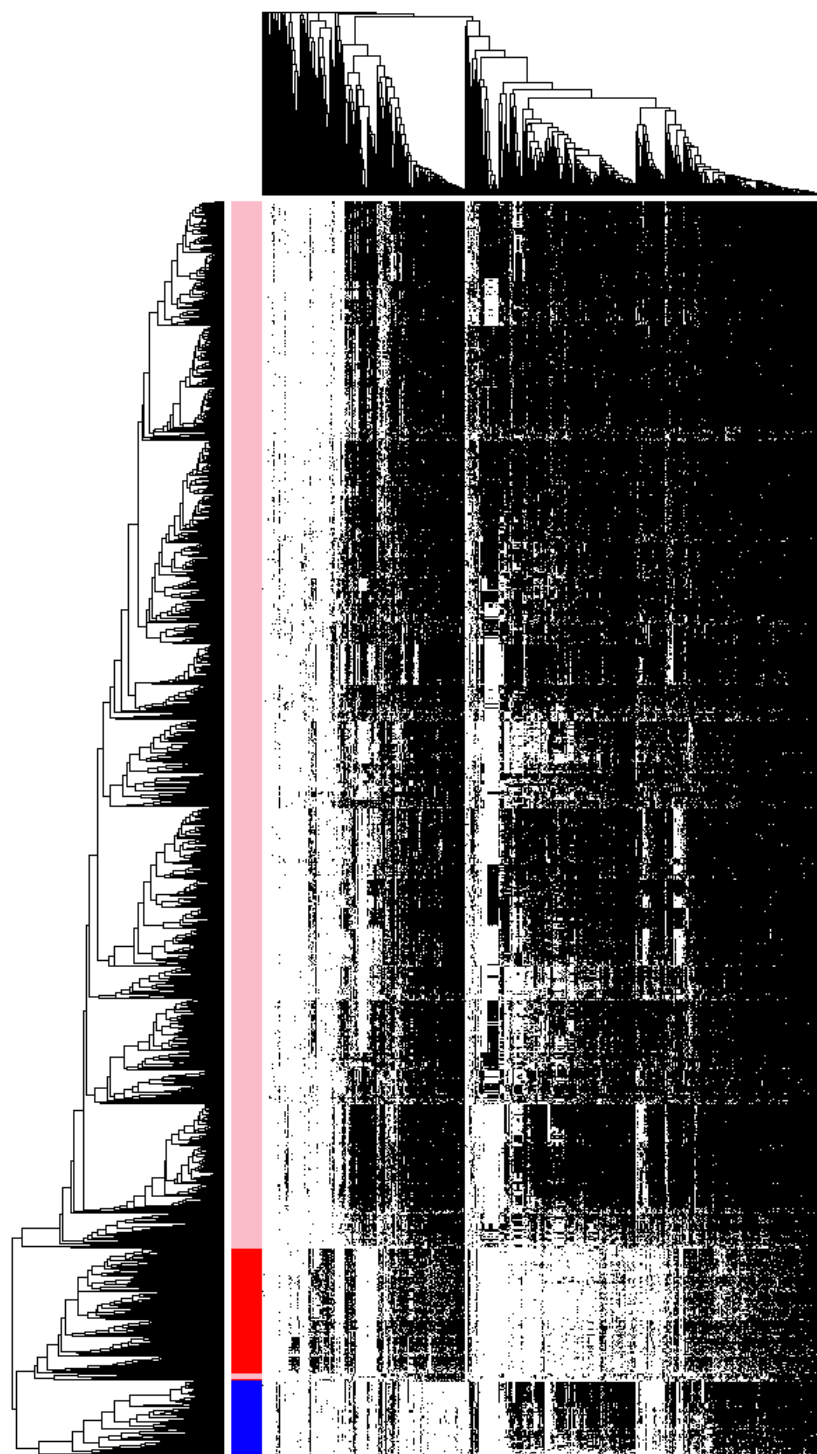

663  
664 Figure S4. The distribution of 537 widely distributed protein clans (columns) in 2,616 near-  
665 complete and non-redundant genomes (rows) from a reference set with extensive sampling of  
666 genomes from non-CPR bacteria (pink). Genomes are clustered based on the presence (black) /  
667 absence (white) profiles (Jaccard distance, complete linkage). CPR bacteria are colored in red, the  
668 Archaea are colored in blue.

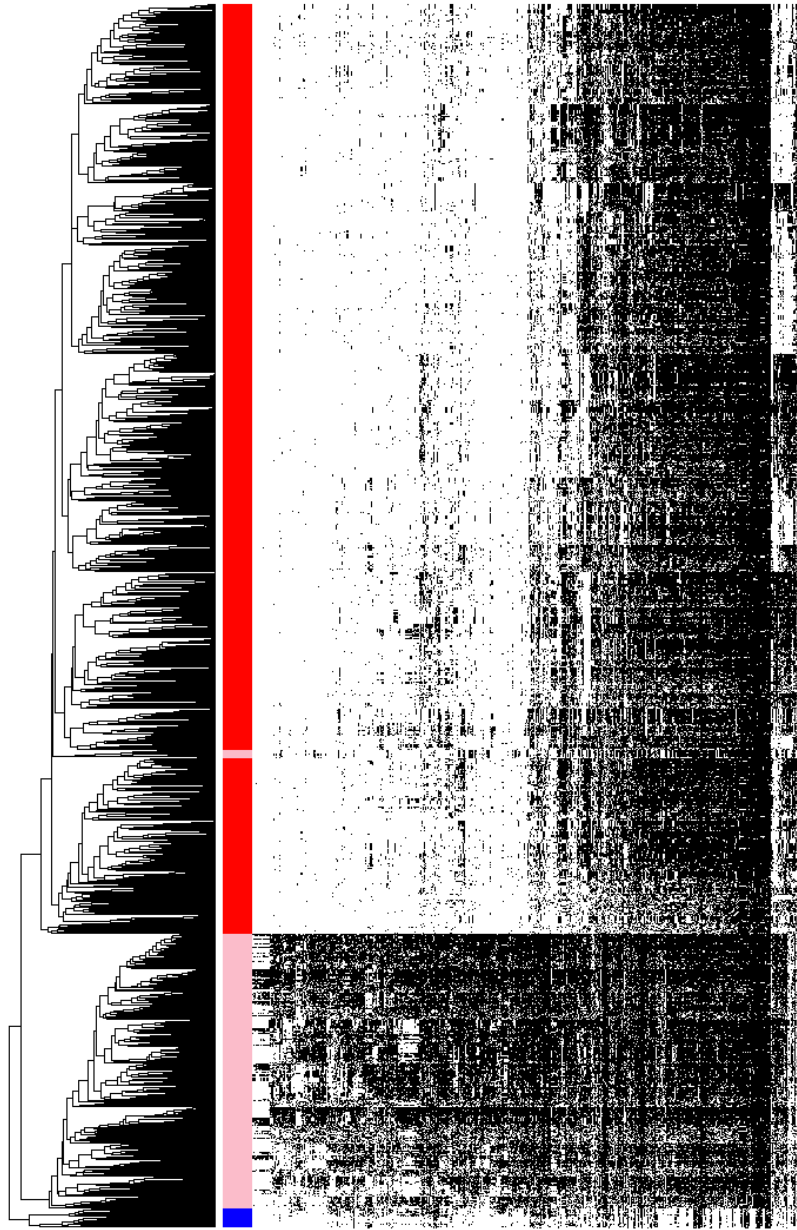

669  
670 Figure S5. The distribution of 699 widely distributed protein families (columns) in 2890 genomes  
671 (rows) from CPR bacteria (red), non-CPR bacteria (pink), and a few archaea (blue) in a reference  
672 set with extensive sampling of genomes from metagenomes (thus includes sequences from many  
673 candidate phyla). The 87 families that are enriched in CPR relative to non-CPR bacteria were not  
674 considered in this analysis. Genomes are clustered based on the presence (black) / absence (white)  
675 profiles (Jaccard distance, complete linkage). Only near-complete and non-redundant genomes  
676 were showed. The order of the families is the same as in Figure 2A. The non-CPR bacteria  
677 genomes (jn pink) that are nested in the CPR (in red) correspond to the dependentiae (TM6)  
678 genomes.



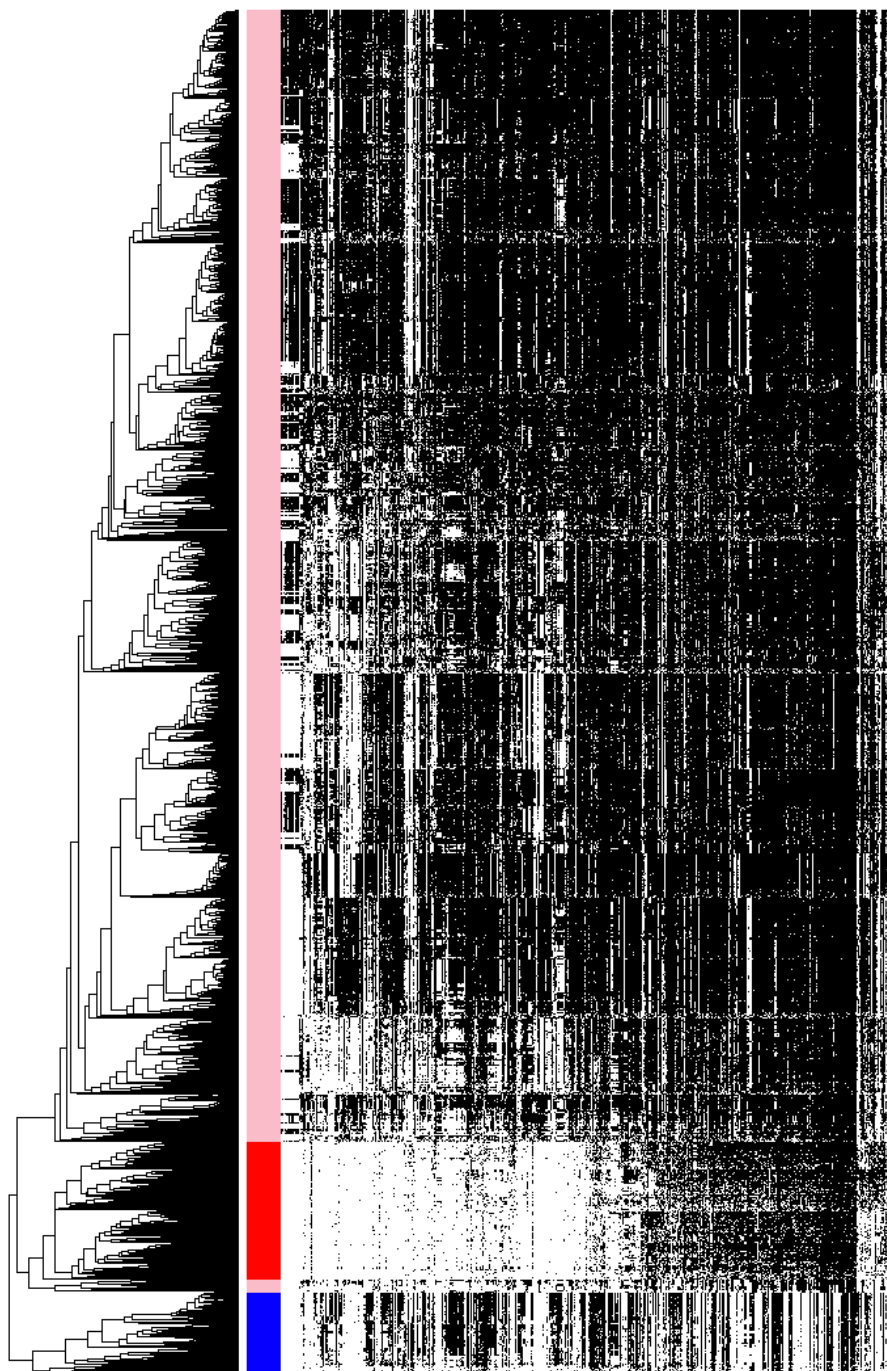

679  
680 Figure S6. Tree resulting from the hierarchical clustering of the genomes based on the distributions  
681 of 699 widely distributed protein families in 2,616 near-complete and non-redundant genomes  
682 from a reference set with extensive sampling of genomes from non-CPR bacteria (pink). The 87  
683 families that are enriched in CPR relative to non-CPR bacteria were not considered in this analysis.  
684 Genomes are clustered based on the presence (black) / absence (white) profiles (Jaccard distance,  
685 complete linkage). The order of the families is the same as in Figure 2A.

| RP    | Pfam accessions | # families | # proteins                        | Family Accession                                                                                   | # unclustered proteins |
|-------|-----------------|------------|-----------------------------------|----------------------------------------------------------------------------------------------------|------------------------|
| RPL2  | PF00181+PF03947 | 2          | 3497<br>54                        | 3.6k.fam07672<br>3.6k.fam04518                                                                     | 3                      |
| RPL3  | PF00297         | 1          | 3434                              | 3.6k.fam03114                                                                                      | 5                      |
| RPL4  | PF00573         | 1          | 3455                              | 3.6k.fam01116                                                                                      | 30                     |
| RPL5  | PF00281+PF00673 | 2          | 3462<br>70                        | 3.6k.fam16812<br>3.6k.fam03533                                                                     | 17                     |
| RPL6  | PF00347+PF00347 | 1          | 3509                              | 3.6k.fam02196                                                                                      | 5                      |
| RPL14 | PF00238         | 1          | 3529                              | 3.6k.fam21706                                                                                      | 6                      |
| RPL15 | PF00828         | 2          | 71<br>3362                        | 3.6k.fam03860<br>3.6k.fam04045                                                                     | 2                      |
| RPL16 | PF00252         | 2          | 53<br>3461                        | 3.6k.fam06774<br>3.6k.fam08297                                                                     | 13                     |
| RPL18 | PF00861         | 1          | 3393                              | 3.6k.fam20082                                                                                      | 2                      |
| RPL22 | PF00237         | 6          | 3300<br>23<br>8<br>32<br>10<br>16 | 3.6k.fam00371<br>3.6k.fam10720<br>3.6k.fam13371<br>3.6k.fam02454<br>3.6k.fam10722<br>3.6k.fam10726 | 87                     |
| RPL24 | PF17136         | 1          | 3408                              | 3.6k.fam11163                                                                                      | 11                     |
| RPS3  | PF07650+PF00189 | 2          | 6<br>3535                         | 3.6k.fam21121<br>3.6k.fam04284                                                                     | 27                     |
| RPS8  | PF00410         | 1          | 3415                              | 3.6k.fam02173                                                                                      | 71                     |
| RPS10 | PF00338         | 1          | 3268                              | 3.6k.fam04313                                                                                      | 5                      |
| RPS17 | PF00366         | 1          | 3498                              | 3.6k.fam02721                                                                                      | 24                     |
| RPS19 | PF00203         | 1          | 3485                              | 3.6k.fam13933                                                                                      | 0                      |

686 Table S1. Quality control of the protein clustering based on the 16 ribosomal proteins (RP). The  
687 rational is because those proteins are highly conserved, we expect to have each of them into a  
688 single cluster (i.e. one family per type of RP). This table summarized the results, each line  
689 corresponds to one RP protein. The proteins annotated as one of the 16 RP were retrieved using  
690 the corresponding Pfam accessions (PFAM accessions column). For 10 of them, all proteins cluster

691 into one single family (# families column). The 6 remaining RP clusters in several families  
692 however there is always one family that contains the majority of the proteins (# proteins column).  
693

694 Table S2. Annotation of the 786 widespread families. Column A: family accession. Column B:  
695 number of proteins in the family. Column C: median length of the proteins. Column D: ratio of  
696 proteins predicted to contain a signal peptide. Column E: median number of predicted  
697 transmembrane helix per protein. Column F: predicted cellular localization according to Psort.  
698 Column G: ggkbase annotation. Column H: domain architecture reported by Pfam. Columns I, J,  
699 K, L, M: KEGG annotations. Column N: number of CPR genomes that carry the family. Column  
700 O: number of non-CPR bacterial genomes that carry the family. Column P: number of DPANN  
701 genomes that carry the family. Column Q: number of non-DPANN archaeal genomes that carry  
702 the family. Column R: Abundancy category of the family in the CPR relative to non-CPR bacteria  
703 (depleted, enriched or equally distributed).

704

705 Table S3. List of the prokaryotic genomes we used in the comparative analysis. For each genome,  
706 the taxonomy, accession and the levels of completeness and contamination are provided.
